# Supplementary material
Source: publisher figshare collection journal article supplement (https://karger.figshare.com/ndownloader/files/31714583)
Supplement: Supplementary file 1 [file 31714583]

| Supplementary table 1A  Baseline characteristics, cerebral and cardiac MRI findings grouped by Fazeka score | | | |
| --- | --- | --- | --- |
|  | Fazeka score = 0  (n=26) | Fazeka score ≥ 1  (n=174) | p-value |
| Male sex | 16 (61.5) | 111 (63.8) | 1 |
| Age, years | 73.5 (2.6) | 76.5 (4.3) | 0.0005 |
| Hypertension | 20 (76.9) | 161 (92.5) | 0.03 |
| Diabetes | 11 (42.3) | 52 (29.9) | 0.3 |
| Heart failure | 1 (3.8) | 6 (3.4) | 1 |
| Previous stroke or TIA | 4 (15.4) | 42 (24.1) | 0.5 |
| AF at 3 months | 4 (15.4) | 24 (13.8) | 1 |
| LAmax, mL/m2 | 50.7 (10.7) | 50.4 (13.2) | 0.9 |
| LAmin, mL/m2 | 25.0 (6.9) | 26.5 (9.6) | 0.4 |
| LATEF, % | 51.1 (5.7) | 48.3 (7.1) | 0.05 |
| LAPEF, % | 19.8 (5.6) | 17.5 (5.1) | 0.03 |
| LAAEF, % | 40.0 (5.5) | 37.9 (7.5) | 0.2 |
| LVEDV, mL/m2 | 77.9 (14.0) | 72.7 (15.8) | 0.1 |
| LVESV, mL/m2 | 27.7 (8.2) | 25.1 (10.3) | 0.2 |
| LVEF, % | 64.9 (5.8) | 66.3 (7.6) | 0.4 |
| LV peak filling rate, ml/s | 394.2 (95.6) | 338.1 (111.5) | 0.01 |

| Supplementary table 1B  Baseline characteristics, cerebral and cardiac MRI findings grouped by lacunar infarcts | | | |
| --- | --- | --- | --- |
|  | Lacunar infarcts = 0  (n=106) | Lacunar infarcts ≥ 1  (n=87) | p-value |
| Male sex | 61 (57.5) | 60 (69.0) | 0.1 |
| Age, years | 75.3 (3.8) | 77.4 (4.5) | 0.0004 |
| Hypertension | 93 (87.7) | 81 (93.1) | 0.3 |
| Diabetes | 37 (34.9) | 25 (28.7) | 0.4 |
| Heart failure | 2 (1.9) | 5 (5.7) | 0.3 |
| Previous stroke or TIA | 17 (16.0) | 25 (28.7) | 0.01 |
| AF at 3 months | 12 (11.3) | 14 (16.1) | 0.3 |
| LAmax, mL/m2 | 47.9 (12.5) | 53.3 (12.9) | 0.003 |
| LAmin, mL/m2 | 24.4 (8.7) | 28.4 (9.6) | 0.003 |
| LATEF, % | 49.8 (6.4) | 47.6 (7.3) | 0.02 |
| LAPEF, % | 18.4 (5.7) | 17.1 (4.3) | 0.07 |
| LAAEF, % | 39.0 (7.1) | 37.5 (7.5) | 0.1 |
| LVEDV, mL/m2 | 72.5 (14.7) | 74.4 (16.9) | 0.4 |
| LVESV, mL/m2 | 24.6 (9.0) | 26.3 (11.4) | 0.3 |
| LVEF, % | 66.7 (7.0) | 65.7 (7.8) | 0.3 |
| LV peak filling rate, ml/s | 354.8 (115.8) | 335.2 (106.3) | 0.2 |
